# Supplementary material for: Crystalline silica-induced proinflammatory eicosanoid storm in novel alveolar macrophage model quelled by docosahexaenoic acid supplementation
Source: Front Immunol. 2023 Nov 9;14:1274147. doi: 10.3389/fimmu.2023.1274147 (PMC10665862; doi:10.3389/fimmu.2023.1274147)
Supplement: Supplementary file 1 [file DataSheet_1.docx]

Supplementary Material

**Crystalline silica-induced proinflammatory eicosanoid storm in novel**

alveolar macrophage model quelled by docosahexaenoic acid supplementation

Olivia K Favor1,2*, Lichchavi D Rajasinghe2,3, Kathryn A Wierenga2,4, Krishna R Maddipati5, Kin Sing Stephen Lee1,2,6, Andrew J Olive7, James J Pestka2,3,7*

1Department of Pharmacology and Toxicology, Michigan State University, East Lansing, MI, United States

2Institute for Integrative Toxicology, Michigan State University, East Lansing, MI, United States

3Department of Food Science and Human Nutrition, Michigan State University, East Lansing, MI, United States

4Department of Biochemistry and Molecular Biology, Michigan State University, East Lansing, MI, United States

5Department of Pathology, Wayne State University, Detroit, MI, United States

6Department of Chemistry, Michigan State University, East Lansing, MI, United States

7Department of Microbiology and Molecular Genetics, Michigan State University, East Lansing, MI, United States

*** Correspondence:**Olivia Favor
favoroli@msu.edu

James Pestka
pestka@msu.edu

# Supplementary Tables

Supplementary Table 1. List of Key Reagents, Chemicals, and Kits

| **Reagent** | **Manufacturer** | **Catalog Number** |
| --- | --- | --- |
| Costar® 6-Well Cell Culture Plate | Corning | 3516 |
| Costar® 24-Well Cell Culture Plate | Corning | 3524 |
| Falcon® 48-Well Cell Culture Plate | Corning | 353078 |
| RPMI 1640 | Gibco | 21875034 |
| Fetal Bovine Serum | R&D Systems | S11150H |
| Penicillin-Streptomycin | Invitrogen | 15140122 |
| mGM-CSF | Peprotech | 315-03 |
| h-TGFβ | Peprotech | 100-21 |
| 0.5 M EDTA | Invitrogen | 15575-038 |
| DPBS, no calcium, no magnesium | Gibco | 14190144 |
| DPBS, calcium, magnesium | Gibco | 14040133 |
| Lipopolysaccharide from *Salmonella enterica* | Millipore Sigma | L6143 |
| Crystalline Silica | U.S. Silica | Min-U-Sil-5 |
| Docosahexaenoic Acid | NU-Chek Prep | U-84-A |
| Triton X-100 | Millipore Sigma | T8787 |
| CulturPlate-96, White Opaque 96-well Microplate | PerkinElmer | 6005680 |
| Z-L-R-AMC Fluorogenic Peptide Substrate VII | R&D Systems | ES008 |
| Polystyrene Microplates | R&D Systems | DY990 |
| Bovine Serum Albumin | Millipore Sigma | A3912 |
| Mouse IL-1 alpha/IL-1F1 DuoSet ELISA | R&D Systems | DY400 |
| Mouse IL-1 beta/IL-1F2 Duoset ELISA | R&D Systems | DY401 |
| Mouse TNF-alpha DuoSet ELISA | R&D Systems | DY410 |
| K-Blue® Advanced Plus TMB Substrate | Neogen | 319175 |
| LysoTracker™ Red DND-99 | Thermo Fisher Scientific | L7528 |
| MitoTracker™ Red CM-H2Xros | Thermo Fisher Scientific | M7513 |
| SYTOX™ Green Nucleic Acid Stain | Thermo Fisher Scientific | S7020 |

Supplementary Table 2. Classification of oxylipins analyzed by the Wayne State University Lipidomics Core Facility

| **Oxylipin** | **Fatty Acid Substrate** | **Classification** |
| --- | --- | --- |
| 9,10-DiHOME | 18:2ω6 | DiHFA (CYP450) |
| 12,13-DiHOME | 18:2ω6 | DiHFA (CYP450) |
| 9(10)-EpOME | 18:2ω6 | EpFA |
| 12(13)-EpOME | 18:2ω6 | EpFA |
| 9-HODE | 18:2ω6 | HFA |
| 13-HODE | 18:2ω6 | HFA |
| 9-OxoODE | 18:2ω6 | Oxo-FA |
| 13-OxoODE | 18:2ω6 | Oxo-FA |
| 13(S)-HOTrE | 18:3ω3 | HFA |
| 13(S)-HOTrE(g) | 18:3ω3 | HFA |
| 9(S)-HOTrE | 18:3ω3 | HFA |
| 9-OxoOTrE | 18:3ω3 | Oxo-FA |
| 11(R)-HEDE | 20:2ω6 | HFA |
| 15(S)-HEDE | 20:2ω6 | HFA |
| 15-OxoEDE | 20:2ω6 | Oxo-FA |
| 8(S)-HETrE | 20:3ω6 | HFA |
| 5(S)-HETrE | 20:3ω6 | HFA |
| 13,14dhPGE1 | 20:3ω6 | Prostaglandin |
| 13,14dh-15k-PGE1 | 20:3ω6 | Prostaglandin |
| D17-PGE1 | 20:3ω6 | Prostaglandin |
| PGE1 | 20:3ω6 | Prostaglandin |
| 15(R)-PGE1 | 20:3ω6 | Prostaglandin |
| 15-keto PGE1 | 20:3ω6 | Prostaglandin |
| Bicyclo PGE1 | 20:3ω6 | Prostaglandin |
| 19(R)-hydroxy PGE1 | 20:3ω6 | Prostaglandin |
| 2,3-dinor PGE1 | 20:3ω6 | Prostaglandin |
| PGF1α | 20:3ω6 | Prostaglandin |
| 6-keto PGE1 | 20:3ω6 | Prostaglandin |
| 5,6-DiHETrE | 20:4ω6 | DiHFA (CYP450) |
| 8,9-DiHETrE | 20:4ω6 | DiHFA (CYP450) |
| 11,12-DiHETrE | 20:4ω6 | DiHFA (CYP450) |
| 14,15-DiHETrE | 20:4ω6 | DiHFA (CYP450) |
| 5(S),12(S)-DiHETE | 20:4ω6 | DiHFA (LOX) |
| 5(S),15(S)-DiHETE | 20:4ω6 | DiHFA (LOX) |
| 8(S),15(S)-DiHETE | 20:4ω6 | DiHFA (LOX) |
| 5(S),6(S)-DiHETE | 20:4ω6 | DiHFA (LOX) |
| 5(6)-EpETrE | 20:4ω6 | EpFA |
| 8(9)-EpETrE | 20:4ω6 | EpFA |
| 11(12)-EpETrE | 20:4ω6 | EpFA |
| 14(15)-EpETrE | 20:4ω6 | EpFA |
| 12-HETE | 20:4ω6 | HFA |
| tetranor 12-HETE | 20:4ω6 | HFA |
| 15-HETE | 20:4ω6 | HFA |
| 5-HETE | 20:4ω6 | HFA |
| 8-HETE | 20:4ω6 | HFA |
| 12(S)-HHTrE | 20:4ω6 | HFA |
| 20-HETE | 20:4ω6 | HFA |
| 9-HETE | 20:4ω6 | HFA |
| 11-HETE | 20:4ω6 | HFA |
| LTB4 | 20:4ω6 | Leukotriene |
| 12-OxoLTB4 | 20:4ω6 | Leukotriene |
| 20-hydroxy LTB4 | 20:4ω6 | Leukotriene |
| 20-COOH LTB4 | 20:4ω6 | Leukotriene |
| 18-carboxy dinor LTB4 | 20:4ω6 | Leukotriene |
| LXA4 | 20:4ω6 | Lipoxin |
| 15-epi LXA4 | 20:4ω6 | Lipoxin |
| 15-oxo LXA4 | 20:4ω6 | Lipoxin |
| LXA5 | 20:4ω6 | Lipoxin |
| LXB4 | 20:4ω6 | Lipoxin |
| 12-OxoETE | 20:4ω6 | Oxo-FA |
| 15-OxoETE | 20:4ω6 | Oxo-FA |
| 5-oxoETE | 20:4ω6 | Oxo-FA |
| PGE2 | 20:4ω6 | Prostaglandin |
| 15-keto PGE2 | 20:4ω6 | Prostaglandin |
| 13,14dh-15k-PGE2 | 20:4ω6 | Prostaglandin |
| Bicyclo PGE2 | 20:4ω6 | Prostaglandin |
| PGA2 | 20:4ω6 | Prostaglandin |
| 19(R)-OH PGE2 & 20-OH PGE2 | 20:4ω6 | Prostaglandin |
| tetranor PGEM | 20:4ω6 | Prostaglandin |
| PGD2 | 20:4ω6 | Prostaglandin |
| PGJ2 | 20:4ω6 | Prostaglandin |
| Δ12-PGJ2 | 20:4ω6 | Prostaglandin |
| 15d-Δ12,14-PGJ2 | 20:4ω6 | Prostaglandin |
| 13,14dh-15k-PGD2 | 20:4ω6 | Prostaglandin |
| PGF2α | 20:4ω6 | Prostaglandin |
| 15-keto PGF2α | 20:4ω6 | Prostaglandin |
| 13,14dh-15k-PGF2α | 20:4ω6 | Prostaglandin |
| 19(R)-OH PGF2α & 20-OH PGF2α | 20:4ω6 | Prostaglandin |
| 8-isoPGF2α & 11bPGF2α | 20:4ω6 | Prostaglandin |
| iPF-VI | 20:4ω6 | Prostaglandin |
| 6kPGF1α | 20:4ω6 | Prostaglandin |
| 6,15-diketo PGFα | 20:4ω6 | Prostaglandin |
| TXB2 | 20:4ω6 | Thromboxane |
| 11dh-TXB2 | 20:4ω6 | Thromboxane |
| 2,3-dinor TXB2 | 20:4ω6 | Thromboxane |
| 11dh-2,3-dinor TXB2 | 20:4ω6 | Thromboxane |
| 5,6-DiHETE(EPA) | 20:5ω3 | DiHFA (CYP450) |
| 5(S),15(S)-DiHEPE | 20:5ω3 | DiHFA (LOX) |
| 8(9)-EpETE | 20:5ω3 | EpFA |
| 11(12)-EpETE | 20:5ω3 | EpFA |
| 14(15)-EpETE | 20:5ω3 | EpFA |
| 17(18)-EpETE | 20:5ω3 | EpFA |
| 12-HEPE | 20:5ω3 | HFA |
| 15(S)-HEPE | 20:5ω3 | HFA |
| 5-HEPE | 20:5ω3 | HFA |
| 8-HEPE | 20:5ω3 | HFA |
| 18-HEPE | 20:5ω3 | HFA |
| 9-HEPE | 20:5ω3 | HFA |
| 11-HEPE | 20:5ω3 | HFA |
| LTB5 | 20:5ω3 | Leukotriene |
| PGE3 | 20:5ω3 | Prostaglandin |
| PGD3 | 20:5ω3 | Prostaglandin |
| 15d-D12,14-PGJ3 | 20:5ω3 | Prostaglandin |
| PGF3α | 20:5ω3 | Prostaglandin |
| RvE1 | 20:5ω3 | Resolvin |
| RvE2 | 20:5ω3 | Resolvin |
| RvE3 | 20:5ω3 | Resolvin |
| TXB3 | 20:5ω3 | Thromboxane |
| 11dh TXB3 | 20:5ω3 | Thromboxane |
| MaR1(n-3DPA) | 22:5ω3 | Maresin |
| PD1(n-3, DPA) | 22:5ω3 | Protectin |
| RvD5(n-3DPA) (7,17-DiHDoPE) | 22:5ω3 | Resolvin |
| 19,20-DiHDoPE | 22:6ω3 | DiHFA (CYP450) |
| 7(8)-EpDPE | 22:6ω3 | EpFA |
| 10(11)-EpDPE | 22:6ω3 | EpFA |
| 13(14)-EpDPE | 22:6ω3 | EpFA |
| 16(17)-EpDPE | 22:6ω3 | EpFA |
| 19(20)-EpDPE | 22:6ω3 | EpFA |
| 14-HDoHE | 22:6ω3 | HFA |
| 17-HDoHE | 22:6ω3 | HFA |
| 4-HDoHE | 22:6ω3 | HFA |
| 7-HDoHE | 22:6ω3 | HFA |
| 8-HDoHE | 22:6ω3 | HFA |
| 10-HDoHE | 22:6ω3 | HFA |
| 11-HDoHE | 22:6ω3 | HFA |
| 13-HDoHE | 22:6ω3 | HFA |
| 16-HDoHE | 22:6ω3 | HFA |
| 20-HDoHE | 22:6ω3 | HFA |
| Maresin1 | 22:6ω3 | Maresin |
| 7(S)-Maresin1 | 22:6ω3 | Maresin |
| PD1 | 22:6ω3 | Protectin |
| AT-PD1 | 22:6ω3 | Protectin |
| 10S,17S-DiHDoHE | 22:6ω3 | Protectin |
| 22-OH-PD1 | 22:6ω3 | Protectin |
| RvD1 & AT-RvD1 | 22:6ω3 | Resolvin |
| RvD2 | 22:6ω3 | Resolvin |
| RvD3 | 22:6ω3 | Resolvin |
| AT-RvD3 | 22:6ω3 | Resolvin |
| RvD4 | 22:6ω3 | Resolvin |
| RvD5 | 22:6ω3 | Resolvin |
| RvD6 (4,17-DiHDoHE) | 22:6ω3 | Resolvin |
| 8-oxoRvD1 | 22:6ω3 | Resolvin |
| 17-oxoRvD1 | 22:6ω3 | Resolvin |

18:2ω6, linoleic acid; 18:3ω3, α-linolenic acid; 20:2ω6, eicosadienoic acid; 20:3ω6, linoleic acid; dihomo-γ-linolenic acid; 20:4ω6, arachidonic acid; 20:5ω3, eicosapentaenoic acid; 22:5ω3, docosapentaenoic acid; 22:6ω3, docosahexaenoic acid; DiHFA, dihydroxy fatty acid; EpFA, epoxy fatty acid; HFA, hydroxy fatty acid; oxo-FA, oxo fatty acid; CYP450, cytochrome P450 monooxygenase; LOX, lipoxygenase.

Supplementary Table 3. Summarized oxylipin data at t = 0 h.

|  | **VEH/VEH** | | | **LPS/VEH** | | | **DHA/VEH** | | | **DHA/LPS** | | |
| --- | --- | --- | --- | --- | --- | --- | --- | --- | --- | --- | --- | --- |
| Σ 18:2ω6-derived | 15.25 | ± | 4.37A | 11.01 | ± | 1.72 A | 10.36 | ± | 2.39 A | 8.64 | ± | 0.36 A |
| Σ 18:3ω3-derived | 0.27 | ± | 0.14 | 0.18 | ± | 0.10 | 0.43 | ± | 0.23 | 0.16 | ± | 0.09 |
| Σ 20:2ω6-derived | 0.04 | ± | 0.02 | 0.04 | ± | 0.03 | 0.01 | ± | 0.01 | 0.03 | ± | 0.02 |
| Σ 20:3ω6-derived | 0.59 | ± | 0.05 | 0.68 | ± | 0.10 | 0.49 | ± | 0.11 | 0.53 | ± | 0.08 |
| Σ 20:4ω6-derived | 10.13 | ± | 0.47 | 13.80 | ± | 1.90 | 11.99 | ± | 0.63 | 11.61 | ± | 0.34 |
| Σ 20:5ω3-derived | 3.77 | ± | 0.26 | 3.56 | ± | 0.27 | 10.04 | ± | 0.14 | 9.51 | ± | 0.34 |
| Σ 22:5ω3-derived | 0.09 | ± | 0.01 | 0.09 | ± | 0.01 | 0.52 | ± | 0.01 | 0.54 | ± | 0.03 |
| Σ 22:6ω3-derived | 3.56 | ± | 0.10 | 3.72 | ± | 0.57 | 42.78 | ± | 5.23 | 31.79 | ± | 0.98 |
| Σ Total ω-6-derived | 26.00 | ± | 4.14 | 25.53 | ± | 2.47 | 22.84 | ± | 2.36 | 20.81 | ± | 20.98 |
| Σ Total ω-3-derived | 7.69 | ± | 0.42 | 7.55 | ± | 0.85 | 53.77 | ± | 4.93 | 42.00 | ± | 42.56 |
| Σ ω-6 EpFA | 0.41 | ± | 0.06 | 0.34 | ± | 0.06 | 0.30 | ± | 0.03 | 0.29 | ± | 0.01 |
| Σ ω-3 EpFA | 0.18 | ± | 0.01 | 0.22 | ± | 0.03 | 2.72 | ± | 0.08 | 1.82 | ± | 0.04 |
| Σ Total EpFA | 0.59 | ± | 0.06 | 0.55 | ± | 0.07 | 3.02 | ± | 0.04 | 2.11 | ± | 0.04 |
| Σ ω-6 DiHFA (CYP450 origin) | 0.55 | ± | 0.08 | 0.64 | ± | 0.05 | 0.69 | ± | 0.05 | 0.66 | ± | 0.06 |
| Σ ω-3 DiHFA (CYP450 origin) | 0.34 | ± | 0.06 | 0.68 | ± | 0.07 | 0.83 | ± | 0.06 | 0.77 | ± | 0.04 |
| Σ Total DiHFA (CYP450 origin) | 0.89 | ± | 0.14 | 0.88 | ± | 0.02 | 5.49 | ± | 0.35 | 4.94 | ± | 0.31 |
| EpFA:DiHFA ratio | 0.53 | ± | 0.08 | 0.48 | ± | 0.08 | 0.38 | ± | 0.03 | 0.28 | ± | 0.01 |
| Σ ω-6 Prostaglandin | 1.33 | ± | 0.15 | 2.65 | ± | 0.12 | 1.24 | ± | 0.08 | 2.05 | ± | 0.09 |
| Σ ω-3 Prostaglandin | 0.00 | ± | 0.00 | 0.01 | ± | 0.01 | 0.00 | ± | 0.00 | 0.00 | ± | 0.00 |
| Σ Total Prostaglandin | 1.33 | ± | 0.15 | 2.66 | ± | 0.13 | 1.24 | ± | 0.08 | 2.05 | ± | 0.09 |
| Σ ω-6 Leukotriene | 0.00 | ± | 0.00 | 0.00 | ± | 0.00 | 0.00 | ± | 0.00 | 0.00 | ± | 0.00 |
| Σ ω-3 Leukotriene | 0.00 | ± | 0.00 | 0.00 | ± | 0.00 | 0.00 | ± | 0.00 | 0.00 | ± | 0.00 |
| Σ Total Leukotriene | 0.00 | ± | 0.00 | 0.00 | ± | 0.00 | 0.00 | ± | 0.00 | 0.00 | ± | 0.00 |
| Σ ω-6 Thromboxane | 0.31 | ± | 0.03 | 0.59 | ± | 0.09 | 0.27 | ± | 0.02 | 0.41 | ± | 0.03 |
| Σ ω-3 Thromboxane | 0.00 | ± | 0.00 | 0.00 | ± | 0.00 | 0.00 | ± | 0.00 | 0.00 | ± | 0.00 |
| Σ Total Thromboxane | 0.31 | ± | 0.03 | 0.59 | ± | 0.09 | 0.27 | ± | 0.02 | 0.41 | ± | 0.03 |
| Σ ω-6 HFA | 18.80 | ± | 2.79 | 17.91 | ± | 2.43 | 17.35 | ± | 2.15 | 14.70 | ± | 0.54 |
| Σ ω-3 HFA | 6.96 | ± | 0.33 | 6.69 | ± | 0.77 | 45.35 | ± | 5.16 | 35.01 | ± | 0.82 |
| Σ HFA (ARA origin) | 8.16 | ± | 0.33 | 10.31 | ± | 1.80 | 9.98 | ± | 0.60 | 8.71 | ± | 0.35 |
| Σ HFA (EPA origin) | 3.63 | ± | 0.24 | 3.40 | ± | 0.25 | 9.32 | ± | 0.15 | 8.94 | ± | 0.32 |
| Σ HFA (DHA origin) | 3.05 | ± | 0.07 | 3.11 | ± | 0.52 | 35.60 | ± | 5.44 | 25.91 | ± | 1.03 |
| Σ Total HFA | 25.75 | ± | 2.99 | 24.60 | ± | 3.16 | 62.71 | ± | 4.19 | 49.71 | ± | 1.26 |
| Σ Total Oxo-FA | 4.59 | ± | 1.24 | 3.56 | ± | 0.39 | 3.11 | ± | 0.23 | 2.81 | ± | 0.22 |
| Σ ω-6 DiHFA  (LOX origin) | 0.01 | ± | 0.01 | 0.01 | ± | 0.01 | 0.02 | ± | 0.01 | 0.02 | ± | 0.02 |
| Σ ω-3 DiHFA  (LOX origin) | 0.00 | ± | 0.00 | 0.00 | ± | 0.00 | 0.00 | ± | 0.00 | 0.00 | ± | 0.00 |
| Σ Total DiHFA  (LOX origin) | 0.01 | ± | 0.01 | 0.01 | ± | 0.01 | 0.02 | ± | 0.01 | 0.02 | ± | 0.02 |
| Σ Total Lipoxin | 0.00 | ± | 0.00 | 0.00 | ± | 0.00 | 0.00 | ± | 0.00 | 0.00 | ± | 0.00 |
| Σ Resolvin  (EPA origin) | 0.03 | ± | 0.01 | 0.04 | ± | 0.01 | 0.02 | ± | 0.00 | 0.01 | ± | 0.01 |
| Σ Resolvin  (DHA origin) | 0.09 | ± | 0.03 | 0.11 | ± | 0.00 | 0.20 | ± | 0.03 | 0.19 | ± | 0.02 |
| Σ Total Resolvin | 0.13 | ± | 0.03 | 0.15 | ± | 0.01 | 0.22 | ± | 0.03 | 0.20 | ± | 0.02 |
| Σ Maresin  (ω-3 DPA origin) | 0.09 | ± | 0.01 | 0.09 | ± | 0.01 | 0.52 | ± | 0.01 | 0.54 | ± | 0.03 |
| Σ Maresin  (DHA origin) | 0.00 | ± | 0.00 | 0.00 | ± | 0.00 | 0.00 | ± | 0.00 | 0.00 | ± | 0.00 |
| Σ Total Maresin | 0.09 | ± | 0.01 | 0.09 | ± | 0.01 | 0.52 | ± | 0.01 | 0.54 | ± | 0.03 |
| Σ Protectin  (ω-3 DPA origin) | 0.00 | ± | 0.00 | 0.00 | ± | 0.00 | 0.00 | ± | 0.00 | 0.00 | ± | 0.00 |
| Σ Protectin  (DHA origin) | 0.00 | ± | 0.00 | 0.00 | ± | 0.00 | 0.01 | ± | 0.01 | 0.02 | ± | 0.02 |
| Σ Total Protectin | 0.00 | ± | 0.00 | 0.00 | ± | 0.00 | 0.01 | ± | 0.01 | 0.02 | ± | 0.02 |

Data are presented in units of pmol/culture as mean ± SEM. 18:2ω6, linoleic acid; 18:3ω3, α-linolenic acid; 20:2ω6, eicosadienoic acid; 20:3ω6, linoleic acid; dihomo-γ-linolenic acid; 20:4ω6, arachidonic acid; 20:5ω3, eicosapentaenoic acid; 22:5ω3, docosapentaenoic acid; 22:6ω3, docosahexaenoic acid; EpFA, epoxy fatty acid; DiHFA, dihydroxy fatty acid; CYP450, cytochrome P450 monooxygenase; HFA, hydroxy fatty acid; oxo-FA, oxo fatty acid; ARA, arachidonic acid; EPA, eicosapentaenoic acid; DPA, docosapentaenoic acid; DHA, docosahexaenoic acid.

Supplementary Table 4. Summarized oxylipin data at t = 1.5 h.

|  | **VEH/VEH** | | | **LPS/VEH** | | | **VEH/cSiO2** | | | **LPS/cSiO2** | | | **DHA-**  **VEH/VEH** | | | **DHA-**  **LPS/VEH** | | | **DHA-**  **VEH/cSiO2** | | | **DHA-**  **LPS/cSiO2** | | |
| --- | --- | --- | --- | --- | --- | --- | --- | --- | --- | --- | --- | --- | --- | --- | --- | --- | --- | --- | --- | --- | --- | --- | --- | --- |
| Σ 18:2ω6-derived | 8.52 | ± | 1.14A | 15.87 | ± | 6.50A | 27.66 | ± | 10.16A | 34.01 | ± | 20.09A | 13.82 | ± | 4.57A | 79.99 | ± | 48.52A | 14.74 | ± | 1.48A | 17.80 | ± | 4.06A |
| Σ 18:3ω3-derived | 0.06 | ± | 0.04 | 0.14 | ± | 0.09 | 1.61 | ± | 0.28 | 1.48 | ± | 1.12 | 0.20 | ± | 0.10 | 1.74 | ± | 1.71 | 0.28 | ± | 0.22 | 0.41 | ± | 0.21 |
| Σ 20:2ω6-derived | 0.00 | ± | 0.00 | 0.00 | ± | 0.00 | 0.34 | ± | 0.04 | 0.34 | ± | 0.03 | 0.07 | ± | 0.05 | 0.25 | ± | 0.25 | 0.17 | ± | 0.02 | 0.11 | ± | 0.05 |
| Σ 20:3ω6-derived | 0.38 | ± | 0.10 | 0.51 | ± | 0.06 | 4.89 | ± | 0.09 | 6.69 | ± | 0.07 | 0.56 | ± | 0.07 | 0.63 | ± | 0.12 | 2.45 | ± | 0.17 | 2.01 | ± | 0.53 |
| Σ 20:4ω6-derived | 11.58 | ± | 0.36 | 23.81 | ± | 1.31 | 299.93 | ± | 6.36 | 474.67 | ± | 11.98 | 13.47 | ± | 1.17 | 13.44 | ± | 0.55 | 162.74 | ± | 7.62 | 163.41 | ± | 29.20 |
| Σ 20:5ω3-derived | 4.49 | ± | 0.25 | 3.54 | ± | 0.21 | 11.62 | ± | 0.05 | 12.27 | ± | 0.32 | 10.73 | ± | 0.14 | 12.04 | ± | 0.31 | 21.29 | ± | 0.15 | 16.36 | ± | 2.37 |
| Σ 22:5ω3-derived | 0.15 | ± | 0.01 | 0.00 | ± | 0.00 | 0.22 | ± | 0.01 | 0.22 | ± | 0.02 | 0.55 | ± | 0.03 | 0.41 | ± | 0.04 | 0.72 | ± | 0.06 | 0.56 | ± | 0.07 |
| Σ 22:6ω3-derived | 4.07 | ± | 0.01 | 4.81 | ± | 0.19 | 15.97 | ± | 0.31 | 14.83 | ± | 0.74 | 50.00 | ± | 8.48 | 61.29 | ± | 16.28 | 95.85 | ± | 2.43 | 76.49 | ± | 19.17 |
| Σ Total ω-6-derived | 20.47 | ± | 1.30 | 40.19 | ± | 6.86 | 332.81 | ± | 12.70 | 515.71 | ± | 30.00 | 27.91 | ± | 5.20 | 94.30 | ± | 48.50 | 180.10 | ± | 7.55 | 183.32 | ± | 26.56 |
| Σ Total ω-3-derived | 8.76 | ± | 0.28 | 8.49 | ± | 0.48 | 29.43 | ± | 0.56 | 28.79 | ± | 1.80 | 61.48 | ± | 8.52 | 75.48 | ± | 16.52 | 118.13 | ± | 2.39 | 93.82 | ± | 21.49 |
| Σ ω-6 EpFA | 0.33 | ± | 0.09 | 0.55 | ± | 0.22 | 0.93 | ± | 0.06 | 1.87 | ± | 0.12 | 0.37 | ± | 0.07 | 1.49 | ± | 0.26 | 0.87 | ± | 0.08 | 1.21 | ± | 0.22 |
| Σ ω-3 EpFA | 0.22 | ± | 0.00 | 0.56 | ± | 0.03 | 0.66 | ± | 0.03 | 0.75 | ± | 0.04 | 3.04 | ± | 0.04 | 1.35 | ± | 0.08 | 3.70 | ± | 0.11 | 2.71 | ± | 0.46 |
| Σ Total EpFA | 0.55 | ± | 0.09 | 1.11 | ± | 0.21 | 1.59 | ± | 0.05 | 2.63 | ± | 0.14 | 3.41 | ± | 0.03 | 2.85 | ± | 0.30 | 4.58 | ± | 0.19 | 3.91 | ± | 0.37 |
| Σ ω-6 DiHFA (CYP450 origin) | 0.94 | ± | 0.22 | 0.54 | ± | 0.13 | 1.44 | ± | 0.14 | 1.57 | ± | 0.18 | 0.80 | ± | 0.05 | 1.15 | ± | 0.20 | 1.11 | ± | 0.06 | 0.93 | ± | 0.13 |
| Σ ω-3 DiHFA (CYP450 origin) | 1.00 | ± | 0.26 | 0.73 | ± | 0.21 | 1.53 | ± | 0.11 | 1.72 | ± | 0.18 | 1.03 | ± | 0.06 | 1.75 | ± | 0.28 | 1.35 | ± | 0.05 | 1.17 | ± | 0.11 |
| Σ Total DiHFA (CYP450 origin) | 1.26 | ± | 0.27 | 1.24 | ± | 0.08 | 1.87 | ± | 0.08 | 1.92 | ± | 0.15 | 5.37 | ± | 0.04 | 1.74 | ± | 0.03 | 4.33 | ± | 0.39 | 3.12 | ± | 0.61 |
| EpFA:DiHFA ratio | 0.32 | ± | 0.01 | 0.68 | ± | 0.16 | 0.63 | ± | 0.01 | 1.12 | ± | 0.03 | 0.43 | ± | 0.01 | 1.26 | ± | 0.14 | 0.79 | ± | 0.12 | 1.04 | ± | 0.24 |
| Σ ω-6 Prostaglandin | 1.75 | ± | 0.15 | 7.69 | ± | 0.39 | 40.46 | ± | 1.69 | 89.94 | ± | 4.33 | 1.46 | ± | 0.03 | 3.13 | ± | 0.14 | 22.29 | ± | 1.70 | 27.71 | ± | 2.65 |
| Σ ω-3 Prostaglandin | 0.00 | ± | 0.00 | 0.00 | ± | 0.00 | 0.06 | ± | 0.03 | 0.07 | ± | 0.04 | 0.00 | ± | 0.00 | 0.00 | ± | 0.00 | 0.15 | ± | 0.03 | 0.12 | ± | 0.01 |
| Σ Total Prostaglandin | 1.75 | ± | 0.15 | 7.69 | ± | 0.39 | 40.52 | ± | 1.66 | 90.01 | ± | 4.31 | 1.46 | ± | 0.03 | 3.13 | ± | 0.14 | 22.44 | ± | 1.73 | 27.83 | ± | 2.66 |
| Σ ω-6 Leukotriene | 0.00 | ± | 0.00 | 0.00 | ± | 0.00 | 0.43 | ± | 0.03 | 1.72 | ± | 0.03 | 0.00 | ± | 0.00 | 0.00 | ± | 0.00 | 0.37 | ± | 0.04 | 0.46 | ± | 0.08 |
| Σ ω-3 Leukotriene | 0.00 | ± | 0.00 | 0.00 | ± | 0.00 | 0.00 | ± | 0.00 | 0.00 | ± | 0.00 | 0.01 | ± | 0.01 | 0.00 | ± | 0.00 | 0.00 | ± | 0.00 | 0.00 | ± | 0.00 |
| Σ Total Leukotriene | 0.00 | ± | 0.00 | 0.00 | ± | 0.00 | 0.43 | ± | 0.03 | 1.72 | ± | 0.03 | 0.01 | ± | 0.00 | 0.00 | ± | 0.00 | 0.37 | ± | 0.04 | 0.46 | ± | 0.08 |
| Σ ω-6 Thromboxane | 0.48 | ± | 0.09 | 3.94 | ± | 0.21 | 18.92 | ± | 1.08 | 33.90 | ± | 0.80 | 0.37 | ± | 0.03 | 0.89 | ± | 0.01 | 9.23 | ± | 0.50 | 10.49 | ± | 0.83 |
| Σ ω-3 Thromboxane | 0.00 | ± | 0.00 | 0.02 | ± | 0.02 | 0.06 | ± | 0.00 | 0.14 | ± | 0.02 | 0.00 | ± | 0.00 | 0.00 | ± | 0.00 | 0.11 | ± | 0.02 | 0.13 | ± | 0.01 |
| Σ Total Thromboxane | 0.48 | ± | 0.09 | 3.95 | ± | 0.20 | 18.98 | ± | 1.08 | 34.04 | ± | 0.80 | 0.37 | ± | 0.03 | 0.89 | ± | 0.01 | 9.35 | ± | 0.49 | 10.61 | ± | 0.84 |
| Σ ω-6 HFA | 14.54 | ± | 0.98 | 21.65 | ± | 4.02 | 264.09 | ± | 11.95 | 378.47 | ± | 28.05 | 21.04 | ± | 3.99 | 68.88 | ± | 42.49 | 141.27 | ± | 5.64 | 135.84 | ± | 25.24 |
| Σ ω-3 HFA | 7.75 | ± | 0.17 | 6.86 | ± | 0.42 | 27.74 | ± | 0.59 | 26.94 | ± | 1.66 | 52.88 | ± | 8.50 | 72.16 | ± | 16.48 | 109.62 | ± | 2.46 | 87.35 | ± | 20.55 |
| Σ HFA (ARA origin) | 8.72 | ± | 0.48 | 12.24 | ± | 0.83 | 237.31 | ± | 4.60 | 344.44 | ± | 13.61 | 10.92 | ± | 1.01 | 9.27 | ± | 0.53 | 129.16 | ± | 5.38 | 121.44 | ± | 26.97 |
| Σ HFA (EPA origin) | 4.33 | ± | 0.23 | 3.23 | ± | 0.22 | 11.16 | ± | 0.10 | 11.54 | ± | 0.28 | 9.88 | ± | 0.11 | 11.51 | ± | 0.33 | 20.09 | ± | 0.17 | 15.46 | ± | 2.20 |
| Σ HFA (DHA origin) | 3.37 | ± | 0.10 | 3.48 | ± | 0.13 | 14.96 | ± | 0.32 | 13.96 | ± | 0.71 | 42.80 | ± | 8.45 | 58.97 | ± | 16.26 | 89.25 | ± | 2.52 | 71.52 | ± | 18.43 |
| Σ Total HFA | 22.28 | ± | 1.14 | 28.51 | ± | 3.99 | 291.83 | ± | 12.54 | 405.42 | ± | 29.71 | 73.91 | ± | 4.52 | 141.05 | ± | 48.85 | 250.89 | ± | 6.04 | 223.19 | ± | 45.42 |
| Σ Total Oxo-FA | 2.58 | ± | 0.27 | 6.09 | ± | 2.54 | 6.53 | ± | 1.17 | 8.23 | ± | 1.87 | 3.97 | ± | 1.23 | 19.53 | ± | 5.90 | 5.18 | ± | 0.62 | 6.95 | ± | 1.85 |
| Σ ω-6 DiHFA  (LOX origin) | 0.02 | ± | 0.01 | 0.02 | ± | 0.01 | 0.05 | ± | 0.01 | 0.07 | ± | 0.02 | 0.08 | ± | 0.01 | 0.02 | ± | 0.00 | 0.02 | ± | 0.00 | 0.03 | ± | 0.02 |
| Σ ω-3 DiHFA  (LOX origin) | 0.00 | ± | 0.00 | 0.00 | ± | 0.00 | 0.00 | ± | 0.00 | 0.04 | ± | 0.01 | 0.00 | ± | 0.00 | 0.00 | ± | 0.00 | 0.02 | ± | 0.01 | 0.00 | ± | 0.00 |
| Σ Total DiHFA  (LOX origin) | 0.02 | ± | 0.01 | 0.02 | ± | 0.01 | 0.05 | ± | 0.01 | 0.10 | ± | 0.02 | 0.08 | ± | 0.01 | 0.02 | ± | 0.01 | 0.04 | ± | 0.01 | 0.03 | ± | 0.02 |
| Σ Total Lipoxin | 0.00 | ± | 0.00 | 0.00 | ± | 0.00 | 0.01 | ± | 0.01 | 0.04 | ± | 0.01 | 0.00 | ± | 0.00 | 0.00 | ± | 0.00 | 0.01 | ± | 0.01 | 0.02 | ± | 0.02 |
| Σ Resolvin  (EPA origin) | 0.03 | ± | 0.01 | 0.01 | ± | 0.01 | 0.04 | ± | 0.00 | 0.04 | ± | 0.00 | 0.03 | ± | 0.00 | 0.02 | ± | 0.00 | 0.05 | ± | 0.02 | 0.03 | ± | 0.02 |
| Σ Resolvin  (DHA origin) | 0.11 | ± | 0.06 | 0.06 | ± | 0.00 | 0.16 | ± | 0.01 | 0.11 | ± | 0.02 | 0.23 | ± | 0.03 | 0.14 | ± | 0.02 | 0.26 | ± | 0.05 | 0.31 | ± | 0.05 |
| Σ Total Resolvin | 0.14 | ± | 0.07 | 0.08 | ± | 0.01 | 0.20 | ± | 0.01 | 0.16 | ± | 0.01 | 0.26 | ± | 0.03 | 0.17 | ± | 0.03 | 0.31 | ± | 0.06 | 0.33 | ± | 0.06 |
| Σ Maresin  (ω-3 DPA origin) | 0.15 | ± | 0.01 | 0.00 | ± | 0.00 | 0.22 | ± | 0.01 | 0.22 | ± | 0.02 | 0.55 | ± | 0.03 | 0.41 | ± | 0.04 | 0.72 | ± | 0.06 | 0.56 | ± | 0.07 |
| Σ Maresin  (DHA origin) | 0.00 | ± | 0.00 | 0.00 | ± | 0.00 | 0.01 | ± | 0.01 | 0.00 | ± | 0.00 | 0.00 | ± | 0.00 | 0.00 | ± | 0.00 | 0.00 | ± | 0.00 | 0.00 | ± | 0.00 |
| Σ Total Maresin | 0.15 | ± | 0.01 | 0.00 | ± | 0.00 | 0.24 | ± | 0.02 | 0.22 | ± | 0.02 | 0.55 | ± | 0.03 | 0.41 | ± | 0.04 | 0.72 | ± | 0.06 | 0.56 | ± | 0.07 |
| Σ Protectin  (ω-3 DPA origin) | 0.00 | ± | 0.00 | 0.00 | ± | 0.00 | 0.00 | ± | 0.00 | 0.00 | ± | 0.00 | 0.00 | ± | 0.00 | 0.00 | ± | 0.00 | 0.00 | ± | 0.00 | 0.00 | ± | 0.00 |
| Σ Protectin  (DHA origin) | 0.03 | ± | 0.02 | 0.00 | ± | 0.00 | 0.00 | ± | 0.00 | 0.01 | ± | 0.01 | 0.02 | ± | 0.02 | 0.00 | ± | 0.00 | 0.01 | ± | 0.01 | 0.12 | ± | 0.12 |
| Σ Total Protectin | 0.03 | ± | 0.02 | 0.00 | ± | 0.00 | 0.00 | ± | 0.00 | 0.01 | ± | 0.01 | 0.02 | ± | 0.02 | 0.00 | ± | 0.00 | 0.01 | ± | 0.01 | 0.12 | ± | 0.12 |

Data are presented in units of pmol/culture as mean ± SEM. 18:2ω6, linoleic acid; 18:3ω3, α-linolenic acid; 20:2ω6, eicosadienoic acid; 20:3ω6, linoleic acid; dihomo-γ-linolenic acid; 20:4ω6, arachidonic acid; 20:5ω3, eicosapentaenoic acid; 22:5ω3, docosapentaenoic acid; 22:6ω3, docosahexaenoic acid; EpFA, epoxy fatty acid; DiHFA, dihydroxy fatty acid; CYP450, cytochrome P450 monooxygenase; HFA, hydroxy fatty acid; oxo-FA, oxo fatty acid; ARA, arachidonic acid; EPA, eicosapentaenoic acid; DPA, docosapentaenoic acid; DHA, docosahexaenoic acid.

Supplementary Table 5. Summarized oxylipin data at t = 4 h.

|  | **VEH/VEH** | | | **LPS/VEH** | | | **VEH/cSiO2** | | | **LPS/cSiO2** | | | **DHA-VEH/VEH** | | | **DHA-**  **LPS/VEH** | | | **DHA-**  **VEH/cSiO2** | | | **DHA-**  **LPS/cSiO2** | | |
| --- | --- | --- | --- | --- | --- | --- | --- | --- | --- | --- | --- | --- | --- | --- | --- | --- | --- | --- | --- | --- | --- | --- | --- | --- |
| Σ 18:2ω6-derived | 11.99 | ± | 1.87 | 177.51 | ± | 85.19 | 48.76 | ± | 23.73 | 21.65 | ± | 1.83 | 9.73 | ± | 2.56 | 25.77 | ± | 2.71 | 59.23 | ± | 20.61 | 39.37 | ± | 11.61 |
| Σ 18:3ω3-derived | 0.16 | ± | 0.11 | 1.86 | ± | 1.78 | 0.97 | ± | 0.17 | 0.99 | ± | 0.12 | 0.11 | ± | 0.07 | 0.29 | ± | 0.14 | 1.03 | ± | 0.36 | 0.35 | ± | 0.30 |
| Σ 20:2ω6-derived | 0.00 | ± | 0.00 | 0.00 | ± | 0.00 | 0.43 | ± | 0.04 | 0.50 | ± | 0.07 | 0.02 | ± | 0.01 | 0.02 | ± | 0.02 | 0.35 | ± | 0.03 | 0.30 | ± | 0.01 |
| Σ 20:3ω6-derived | 0.53 | ± | 0.13 | 0.77 | ± | 0.10 | 9.04 | ± | 0.46 | 10.70 | ± | 0.06 | 0.71 | ± | 0.06 | 0.80 | ± | 0.08 | 6.84 | ± | 0.32 | 5.25 | ± | 0.39 |
| Σ 20:4ω6-derived | 19.38 | ± | 4.42 | 30.37 | ± | 14.59 | 559.57 | ± | 7.73 | 680.84 | ± | 3.00 | 20.37 | ± | 0.67 | 29.77 | ± | 2.99 | 364.44 | ± | 10.83 | 352.40 | ± | 9.73 |
| Σ 20:5ω3-derived | 6.27 | ± | 0.58 | 10.90 | ± | 1.57 | 16.83 | ± | 0.32 | 17.36 | ± | 0.20 | 16.23 | ± | 0.39 | 12.36 | ± | 1.10 | 34.61 | ± | 0.61 | 30.24 | ± | 1.88 |
| Σ 22:5ω3-derived | 0.22 | ± | 0.04 | 0.22 | ± | 0.04 | 0.31 | ± | 0.01 | 0.28 | ± | 0.01 | 0.99 | ± | 0.07 | 0.45 | ± | 0.09 | 0.83 | ± | 0.03 | 0.89 | ± | 0.01 |
| Σ 22:6ω3-derived | 5.37 | ± | 0.51 | 25.33 | ± | 9.81 | 27.20 | ± | 1.06 | 26.42 | ± | 0.34 | 51.33 | ± | 5.13 | 45.04 | ± | 2.93 | 181.21 | ± | 5.82 | 156.41 | ± | 5.67 |
| Σ Total ω-6-derived | 31.90 | ± | 3.98 | 208.64 | ± | 71.33 | 617.79 | ± | 22.68 | 713.69 | ± | 1.54 | 30.83 | ± | 2.64 | 56.35 | ± | 4.94 | 430.86 | ± | 29.19 | 397.33 | ± | 16.34 |
| Σ Total ω-3-derived | 12.02 | ± | 1.07 | 38.31 | ± | 11.79 | 45.30 | ± | 1.04 | 45.05 | ± | 0.39 | 68.65 | ± | 5.26 | 58.14 | ± | 2.03 | 217.68 | ± | 5.39 | 187.89 | ± | 7.58 |
| Σ ω-6 EpFA | 0.39 | ± | 0.01 | 1.86 | ± | 0.75 | 2.36 | ± | 0.41 | 1.86 | ± | 0.23 | 0.34 | ± | 0.06 | 0.89 | ± | 0.22 | 1.92 | ± | 0.46 | 1.89 | ± | 0.30 |
| Σ ω-3 EpFA | 0.22 | ± | 0.03 | 1.20 | ± | 0.35 | 1.12 | ± | 0.03 | 1.02 | ± | 0.01 | 2.85 | ± | 0.24 | 1.56 | ± | 0.17 | 4.52 | ± | 0.11 | 4.31 | ± | 0.29 |
| Σ Total EpFA | 0.61 | ± | 0.03 | 3.05 | ± | 1.10 | 3.49 | ± | 0.44 | 2.88 | ± | 0.23 | 3.18 | ± | 0.30 | 2.45 | ± | 0.39 | 6.44 | ± | 0.36 | 6.20 | ± | 0.57 |
| Σ ω-6 DiHFA (CYP450 origin) | 1.60 | ± | 0.17 | 2.62 | ± | 1.23 | 2.69 | ± | 0.25 | 2.57 | ± | 0.07 | 1.31 | ± | 0.08 | 1.02 | ± | 0.13 | 1.83 | ± | 0.22 | 1.66 | ± | 0.29 |
| Σ ω-3 DiHFA (CYP450 origin) | 1.71 | ± | 0.17 | 3.31 | ± | 1.43 | 3.07 | ± | 0.48 | 2.61 | ± | 0.06 | 1.40 | ± | 0.10 | 1.28 | ± | 0.27 | 2.54 | ± | 0.28 | 2.01 | ± | 0.22 |
| Σ Total DiHFA (CYP450 origin) | 2.14 | ± | 0.21 | 2.69 | ± | 0.86 | 3.50 | ± | 0.22 | 3.10 | ± | 0.11 | 7.97 | ± | 0.20 | 1.96 | ± | 0.13 | 5.26 | ± | 0.11 | 4.64 | ± | 0.61 |
| EpFA:DiHFA ratio | 0.22 | ± | 0.02 | 1.55 | ± | 0.66 | 0.77 | ± | 0.08 | 0.70 | ± | 0.05 | 0.26 | ± | 0.02 | 0.86 | ± | 0.10 | 0.86 | ± | 0.10 | 0.94 | ± | 0.04 |
| Σ ω-6 Prostaglandin | 4.43 | ± | 1.53 | 11.16 | ± | 5.08 | 79.88 | ± | 1.39 | 101.69 | ± | 4.34 | 3.16 | ± | 0.24 | 9.76 | ± | 0.46 | 43.81 | ± | 0.63 | 49.79 | ± | 2.11 |
| Σ ω-3 Prostaglandin | 0.00 | ± | 0.00 | 0.03 | ± | 0.03 | 0.18 | ± | 0.02 | 0.19 | ± | 0.01 | 0.00 | ± | 0.00 | 0.06 | ± | 0.01 | 0.33 | ± | 0.00 | 0.28 | ± | 0.01 |
| Σ Total Prostaglandin | 4.43 | ± | 1.53 | 11.19 | ± | 5.12 | 80.06 | ± | 1.41 | 101.88 | ± | 4.35 | 3.16 | ± | 0.24 | 9.82 | ± | 0.47 | 44.14 | ± | 0.63 | 50.07 | ± | 2.12 |
| Σ ω-6 Leukotriene | 0.02 | ± | 0.02 | 0.00 | ± | 0.00 | 0.60 | ± | 0.03 | 1.77 | ± | 0.14 | 0.00 | ± | 0.00 | 0.01 | ± | 0.01 | 0.27 | ± | 0.02 | 0.49 | ± | 0.07 |
| Σ ω-3 Leukotriene | 0.01 | ± | 0.00 | 0.00 | ± | 0.00 | 0.00 | ± | 0.00 | 0.01 | ± | 0.01 | 0.00 | ± | 0.00 | 0.00 | ± | 0.00 | 0.00 | ± | 0.00 | 0.00 | ± | 0.00 |
| Σ Total Leukotriene | 0.02 | ± | 0.02 | 0.00 | ± | 0.00 | 0.60 | ± | 0.03 | 1.78 | ± | 0.13 | 0.00 | ± | 0.00 | 0.01 | ± | 0.01 | 0.27 | ± | 0.02 | 0.49 | ± | 0.07 |
| Σ ω-6 Thromboxane | 1.10 | ± | 0.27 | 3.63 | ± | 2.79 | 32.15 | ± | 1.95 | 42.75 | ± | 1.77 | 0.69 | ± | 0.07 | 3.62 | ± | 0.19 | 15.81 | ± | 0.79 | 20.50 | ± | 3.23 |
| Σ ω-3 Thromboxane | 0.00 | ± | 0.00 | 0.03 | ± | 0.03 | 0.13 | ± | 0.01 | 0.07 | ± | 0.03 | 0.00 | ± | 0.00 | 0.05 | ± | 0.00 | 0.14 | ± | 0.02 | 0.15 | ± | 0.02 |
| Σ Total Thromboxane | 1.10 | ± | 0.27 | 3.66 | ± | 2.82 | 32.28 | ± | 1.94 | 42.81 | ± | 1.79 | 0.69 | ± | 0.07 | 3.66 | ± | 0.19 | 15.95 | ± | 0.80 | 20.65 | ± | 3.25 |
| Σ ω-6 HFA | 21.14 | ± | 2.14 | 162.03 | ± | 65.44 | 480.29 | ± | 13.68 | 552.36 | ± | 3.75 | 22.55 | ± | 2.32 | 32.16 | ± | 4.16 | 346.54 | ± | 20.56 | 308.13 | ± | 16.22 |
| Σ ω-3 HFA | 10.70 | ± | 0.96 | 33.91 | ± | 10.57 | 42.70 | ± | 1.15 | 42.76 | ± | 0.40 | 57.61 | ± | 5.04 | 54.25 | ± | 2.14 | 207.63 | ± | 5.55 | 178.59 | ± | 6.84 |
| Σ HFA (ARA origin) | 12.45 | ± | 2.40 | 14.16 | ± | 6.91 | 438.46 | ± | 7.15 | 525.66 | ± | 2.46 | 15.39 | ± | 0.76 | 16.30 | ± | 2.38 | 299.62 | ± | 9.34 | 275.86 | ± | 11.08 |
| Σ HFA (EPA origin) | 6.08 | ± | 0.55 | 9.34 | ± | 0.88 | 15.74 | ± | 0.39 | 16.38 | ± | 0.21 | 15.31 | ± | 0.34 | 11.70 | ± | 1.07 | 32.82 | ± | 0.57 | 28.69 | ± | 1.72 |
| Σ HFA (DHA origin) | 4.46 | ± | 0.47 | 22.71 | ± | 9.26 | 25.99 | ± | 1.09 | 25.38 | ± | 0.38 | 42.19 | ± | 4.86 | 42.27 | ± | 3.03 | 173.78 | ± | 5.95 | 149.57 | ± | 5.09 |
| Σ Total HFA | 31.84 | ± | 2.93 | 195.93 | ± | 75.11 | 522.99 | ± | 13.36 | 595.11 | ± | 4.09 | 80.16 | ± | 7.16 | 86.41 | ± | 2.11 | 554.17 | ± | 25.86 | 486.72 | ± | 22.94 |
| Σ Total Oxo-FA | 3.30 | ± | 0.61 | 28.18 | ± | 12.24 | 19.42 | ± | 9.18 | 10.52 | ± | 0.77 | 2.88 | ± | 0.57 | 9.38 | ± | 2.32 | 20.92 | ± | 8.24 | 15.12 | ± | 3.81 |
| Σ ω-6 DiHFA  (LOX origin) | 0.04 | ± | 0.02 | 1.01 | ± | 1.00 | 0.09 | ± | 0.02 | 0.06 | ± | 0.01 | 0.08 | ± | 0.04 | 0.02 | ± | 0.01 | 0.05 | ± | 0.01 | 0.03 | ± | 0.01 |
| Σ ω-3 DiHFA  (LOX origin) | 0.01 | ± | 0.01 | 0.00 | ± | 0.00 | 0.03 | ± | 0.01 | 0.02 | ± | 0.01 | 0.01 | ± | 0.01 | 0.00 | ± | 0.00 | 0.00 | ± | 0.00 | 0.01 | ± | 0.01 |
| Σ Total DiHFA  (LOX origin) | 0.05 | ± | 0.03 | 1.01 | ± | 1.00 | 0.12 | ± | 0.03 | 0.08 | ± | 0.02 | 0.09 | ± | 0.04 | 0.02 | ± | 0.01 | 0.05 | ± | 0.01 | 0.04 | ± | 0.02 |
| Σ Total Lipoxin | 0.02 | ± | 0.01 | 0.00 | ± | 0.00 | 0.09 | ± | 0.01 | 0.08 | ± | 0.02 | 0.01 | ± | 0.01 | 0.00 | ± | 0.00 | 0.04 | ± | 0.00 | 0.04 | ± | 0.02 |
| Σ Resolvin  (EPA origin) | 0.06 | ± | 0.00 | 0.02 | ± | 0.01 | 0.06 | ± | 0.00 | 0.05 | ± | 0.00 | 0.03 | ± | 0.00 | 0.02 | ± | 0.00 | 0.11 | ± | 0.01 | 0.05 | ± | 0.03 |
| Σ Resolvin  (DHA origin) | 0.13 | ± | 0.02 | 1.01 | ± | 0.89 | 0.19 | ± | 0.02 | 0.17 | ± | 0.04 | 0.32 | ± | 0.02 | 0.27 | ± | 0.03 | 0.34 | ± | 0.02 | 0.26 | ± | 0.05 |
| Σ Total Resolvin | 0.18 | ± | 0.02 | 1.03 | ± | 0.89 | 0.25 | ± | 0.02 | 0.22 | ± | 0.04 | 0.35 | ± | 0.02 | 0.29 | ± | 0.03 | 0.45 | ± | 0.01 | 0.31 | ± | 0.07 |
| Σ Maresin  (ω-3 DPA origin) | 0.22 | ± | 0.04 | 0.22 | ± | 0.04 | 0.31 | ± | 0.01 | 0.28 | ± | 0.01 | 0.99 | ± | 0.07 | 0.45 | ± | 0.09 | 0.83 | ± | 0.03 | 0.89 | ± | 0.01 |
| Σ Maresin  (DHA origin) | 0.00 | ± | 0.00 | 0.00 | ± | 0.00 | 0.00 | ± | 0.00 | 0.00 | ± | 0.00 | 0.00 | ± | 0.00 | 0.00 | ± | 0.00 | 0.00 | ± | 0.00 | 0.00 | ± | 0.00 |
| Σ Total Maresin | 0.22 | ± | 0.04 | 0.22 | ± | 0.04 | 0.31 | ± | 0.01 | 0.28 | ± | 0.01 | 0.99 | ± | 0.07 | 0.45 | ± | 0.09 | 0.83 | ± | 0.03 | 0.89 | ± | 0.01 |
| Σ Protectin  (ω-3 DPA origin) | 0.00 | ± | 0.00 | 0.00 | ± | 0.00 | 0.00 | ± | 0.00 | 0.00 | ± | 0.00 | 0.00 | ± | 0.00 | 0.00 | ± | 0.00 | 0.00 | ± | 0.00 | 0.00 | ± | 0.00 |
| Σ Protectin  (DHA origin) | 0.00 | ± | 0.00 | 0.00 | ± | 0.00 | 0.00 | ± | 0.00 | 0.00 | ± | 0.00 | 0.01 | ± | 0.01 | 0.04 | ± | 0.01 | 0.01 | ± | 0.01 | 0.03 | ± | 0.02 |
| Σ Total Protectin | 0.00 | ± | 0.00 | 0.00 | ± | 0.00 | 0.00 | ± | 0.00 | 0.00 | ± | 0.00 | 0.01 | ± | 0.01 | 0.04 | ± | 0.01 | 0.01 | ± | 0.01 | 0.03 | ± | 0.02 |

Data are presented in units of pmol/culture as mean ± SEM. 18:2ω6, linoleic acid; 18:3ω3, α-linolenic acid; 20:2ω6, eicosadienoic acid; 20:3ω6, linoleic acid; dihomo-γ-linolenic acid; 20:4ω6, arachidonic acid; 20:5ω3, eicosapentaenoic acid; 22:5ω3, docosapentaenoic acid; 22:6ω3, docosahexaenoic acid; EpFA, epoxy fatty acid; DiHFA, dihydroxy fatty acid; CYP450, cytochrome P450 monooxygenase; HFA, hydroxy fatty acid; oxo-FA, oxo fatty acid; ARA, arachidonic acid; EPA, eicosapentaenoic acid; DPA, docosapentaenoic acid; DHA, docosahexaenoic acid.

Supplementary Table 6. Examples of studies demonstrating biological functions of selected PUFA-derived oxylipins.

| **Oxylipin** | **Fatty Acid Substrate** | **Functions** | **References** |
| --- | --- | --- | --- |
| PGE2 | 20:4ω6 | Suppresses phagocytic capacity in AMs | (1) |
| Inhibits LPS-induced cytokine release from murine and human monocytes via EP4 receptor | (2) |
| Promotes secretion of SOCS3 from AMs, which suppresses JAK-STAT signaling in alveolar epithelial cells | (3) |
| Inhibits COX-2 expression from BMDMs  Suppresses TNF-α release BMDMs | (4) |
| Inhibits AM proliferation via EP2 receptor | (5) |
| LTB4 | 20:4ω6 | Promotes chemotaxis of PMNs | (6) |
| Promotes release of lysosomal enzymes from PMNs | (7) |
| Promotes secretion of TNF-α from cSiO2- and asbestos-exposed AMs | (8) |
| TXB2 | 20:4ω6 | Decreases pulmonary airflow rate, tidal volume, and dynamic lung compliance in guinea pigs and dogs | (9) |
| Promotes chemotaxis of PMNs | (10) |
| 5-HETE | 20:4ω6 | Induces pulmonary vasoconstriction and edema  Increases lung vascular permeability | (11) |
| Promotes chemotaxis of neutrophils more potently than 5-HEPE | (12) |
| Suppresses biosynthesis of PGE2, LTC4, and TXB2 in murine peritoneal macrophages | (13) |
| 11-HETE | 20:4ω6 | Promotes chemotaxis of neutrophils | (12) |
| 15-HETE | 20:4ω6 | Induces pulmonary vasoconstriction and edema  Increases lung vascular permeability | (11) |
| Suppresses biosynthesis of LTB4 and 5-HETE from AMs | (14) |
| Promotes chemotaxis of neutrophils | (12) |
| Suppresses biosynthesis of PGE2, LTC4, and TXB2 in murine peritoneal macrophages more potently than 5-HETE | (13) |
| 5-HEPE | 22:5ω3 | Promotes macrophage-mediated Treg induction in C57BL/6 mice | (15) |
| Promotes chemotaxis of neutrophils less potently than 5-HETE | (16) |
| 8-HEPE | 22:5ω3 | 8(R)-HEPE but not 8(S)-HEPE promotes expression of cholesterol efflux receptors in macrophages | (17) |
| 15-HEPE | 22:5ω3 | Inhibits activity of 5-LOX | (18) |
| 4-HDoHE | 22:6ω3 | Prevents endothelial cell infiltration and angiogenesis via PPARγ | (19) |
| Prevents apoptotic cell death of hippocampal progenitor cells | (20) |
| 14-HDoHE | 22:6ω3 | Inhibits human platelet aggregation and smooth muscle contraction | (21) |
| 17-HDoHE | 22:6ω3 | Inhibits activity of 5-LOX | (18) |
| Suppresses 5-LOX expression and TNF-α in macrophages | (22) |
| Suppresses LPS-induced TNF-α release from macrophage-like RAW 264.7 cells | (23) |
| Decreases adhesion molecule expression and secretion of proinflammatory cytokines in murine colitis model | (24) |

# Supplementary Figures





**Supplementary Figure 1. LPS, cSiO2, and DHA differentially impact generation of ARA-, DHA-, and EPA-derived oxylipins from VEH- and LPS-treated FLAMs.** FLAMs were treated with ethanolic DHA (25 µM) or ethanol vehicle (VEH) for 24 h, primed with LPS (20 ng/ml), and/or exposed to cSiO2 (12.5 µg/cm2). Cultured FLAMs and supernatants were pooled at t = 0 h, 1.5 h, and 4 h post cSiO2 and 156 oxylipins profiled by targeted LC-MS. Treatment conditions were tested using three biological replicates, and oxylipins were measured using one technical replicate per sample. Heat maps depicting the concentration of scaled DHA/EPA-derived and ARA-derived oxylipins, using unsupervised clustering with the Euclidean distance method.


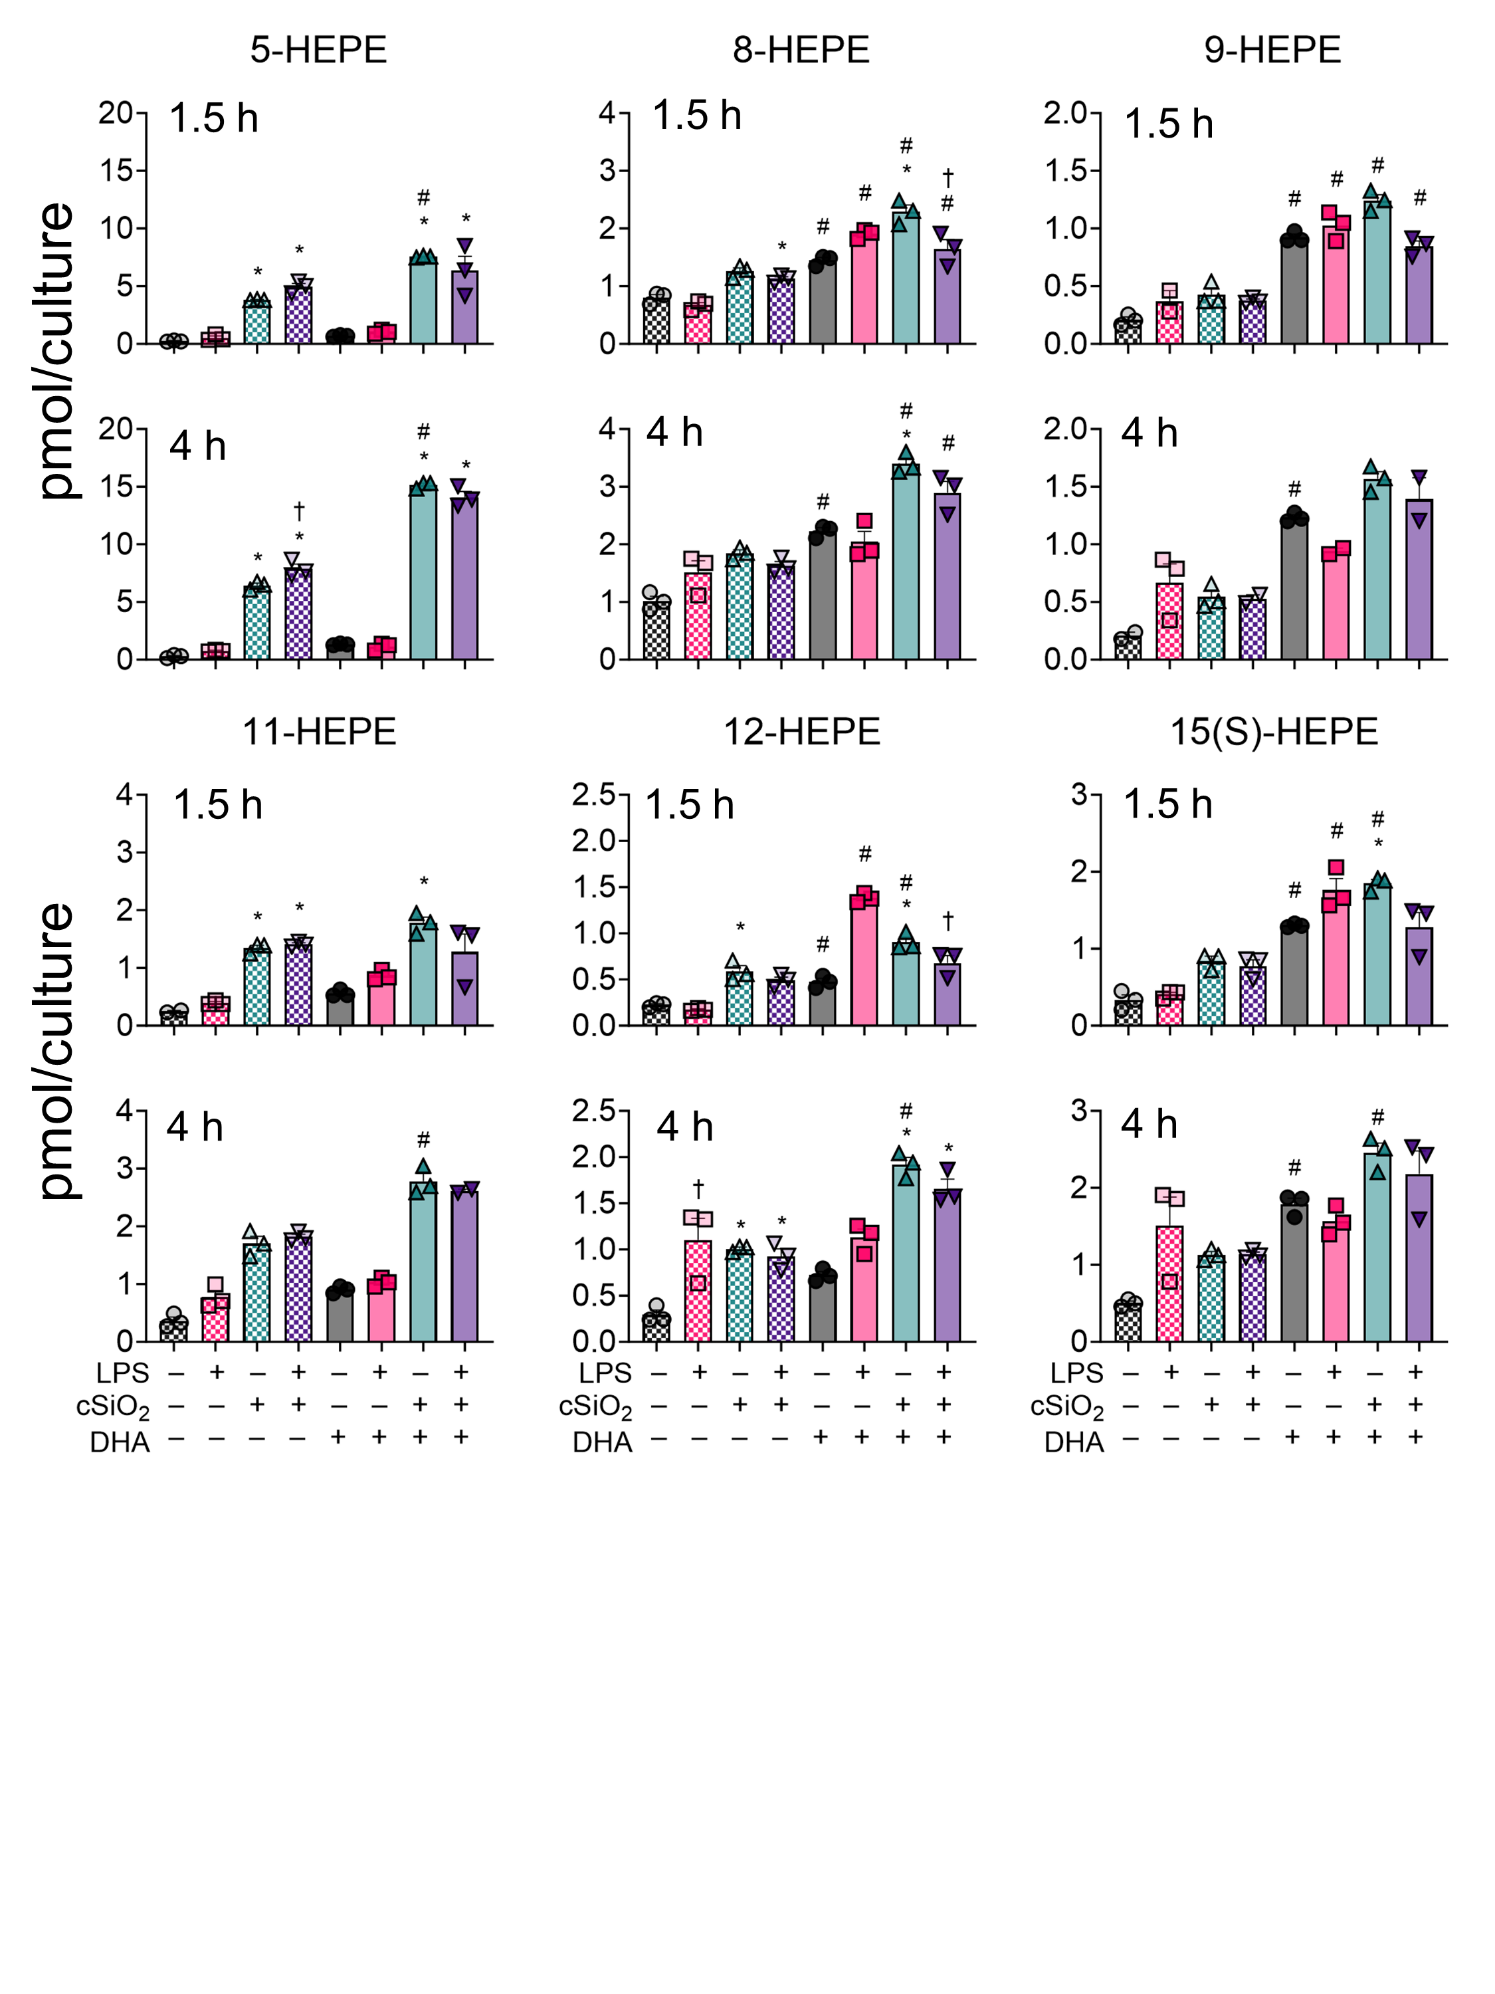


**Supplementary Figure 2. cSiO2-induced production of EPA-derived hydroxy fatty acids (HFAs) is augmented with DHA supplementation.** 5-HEPE, 8-HEPE, 9-HEPE,11-HEPE,12-HEPE, and15(S)-HEPE were quantified by LC-MS for all experimental groups at 1.5 h and 4 h post cSiO2. Treatment conditions were tested using three biological replicates, and oxylipins were measured using one technical replicate per sample. Data are shown as mean ± SEM. MetaboAnalyst Version 5.0 was used for data normalization and statistically significant differences were determined by one-way analysis of variance (ANOVA) (FDR = 0.05) followed by Tukey’s honestly significant difference (HSD) *post-hoc* test. *, FDR q < 0.05 for cSiO2 vs. controls; #, FDR < 0.05 for DHA vs. controls; †, FDR q < 0.05 for LPS vs. controls.


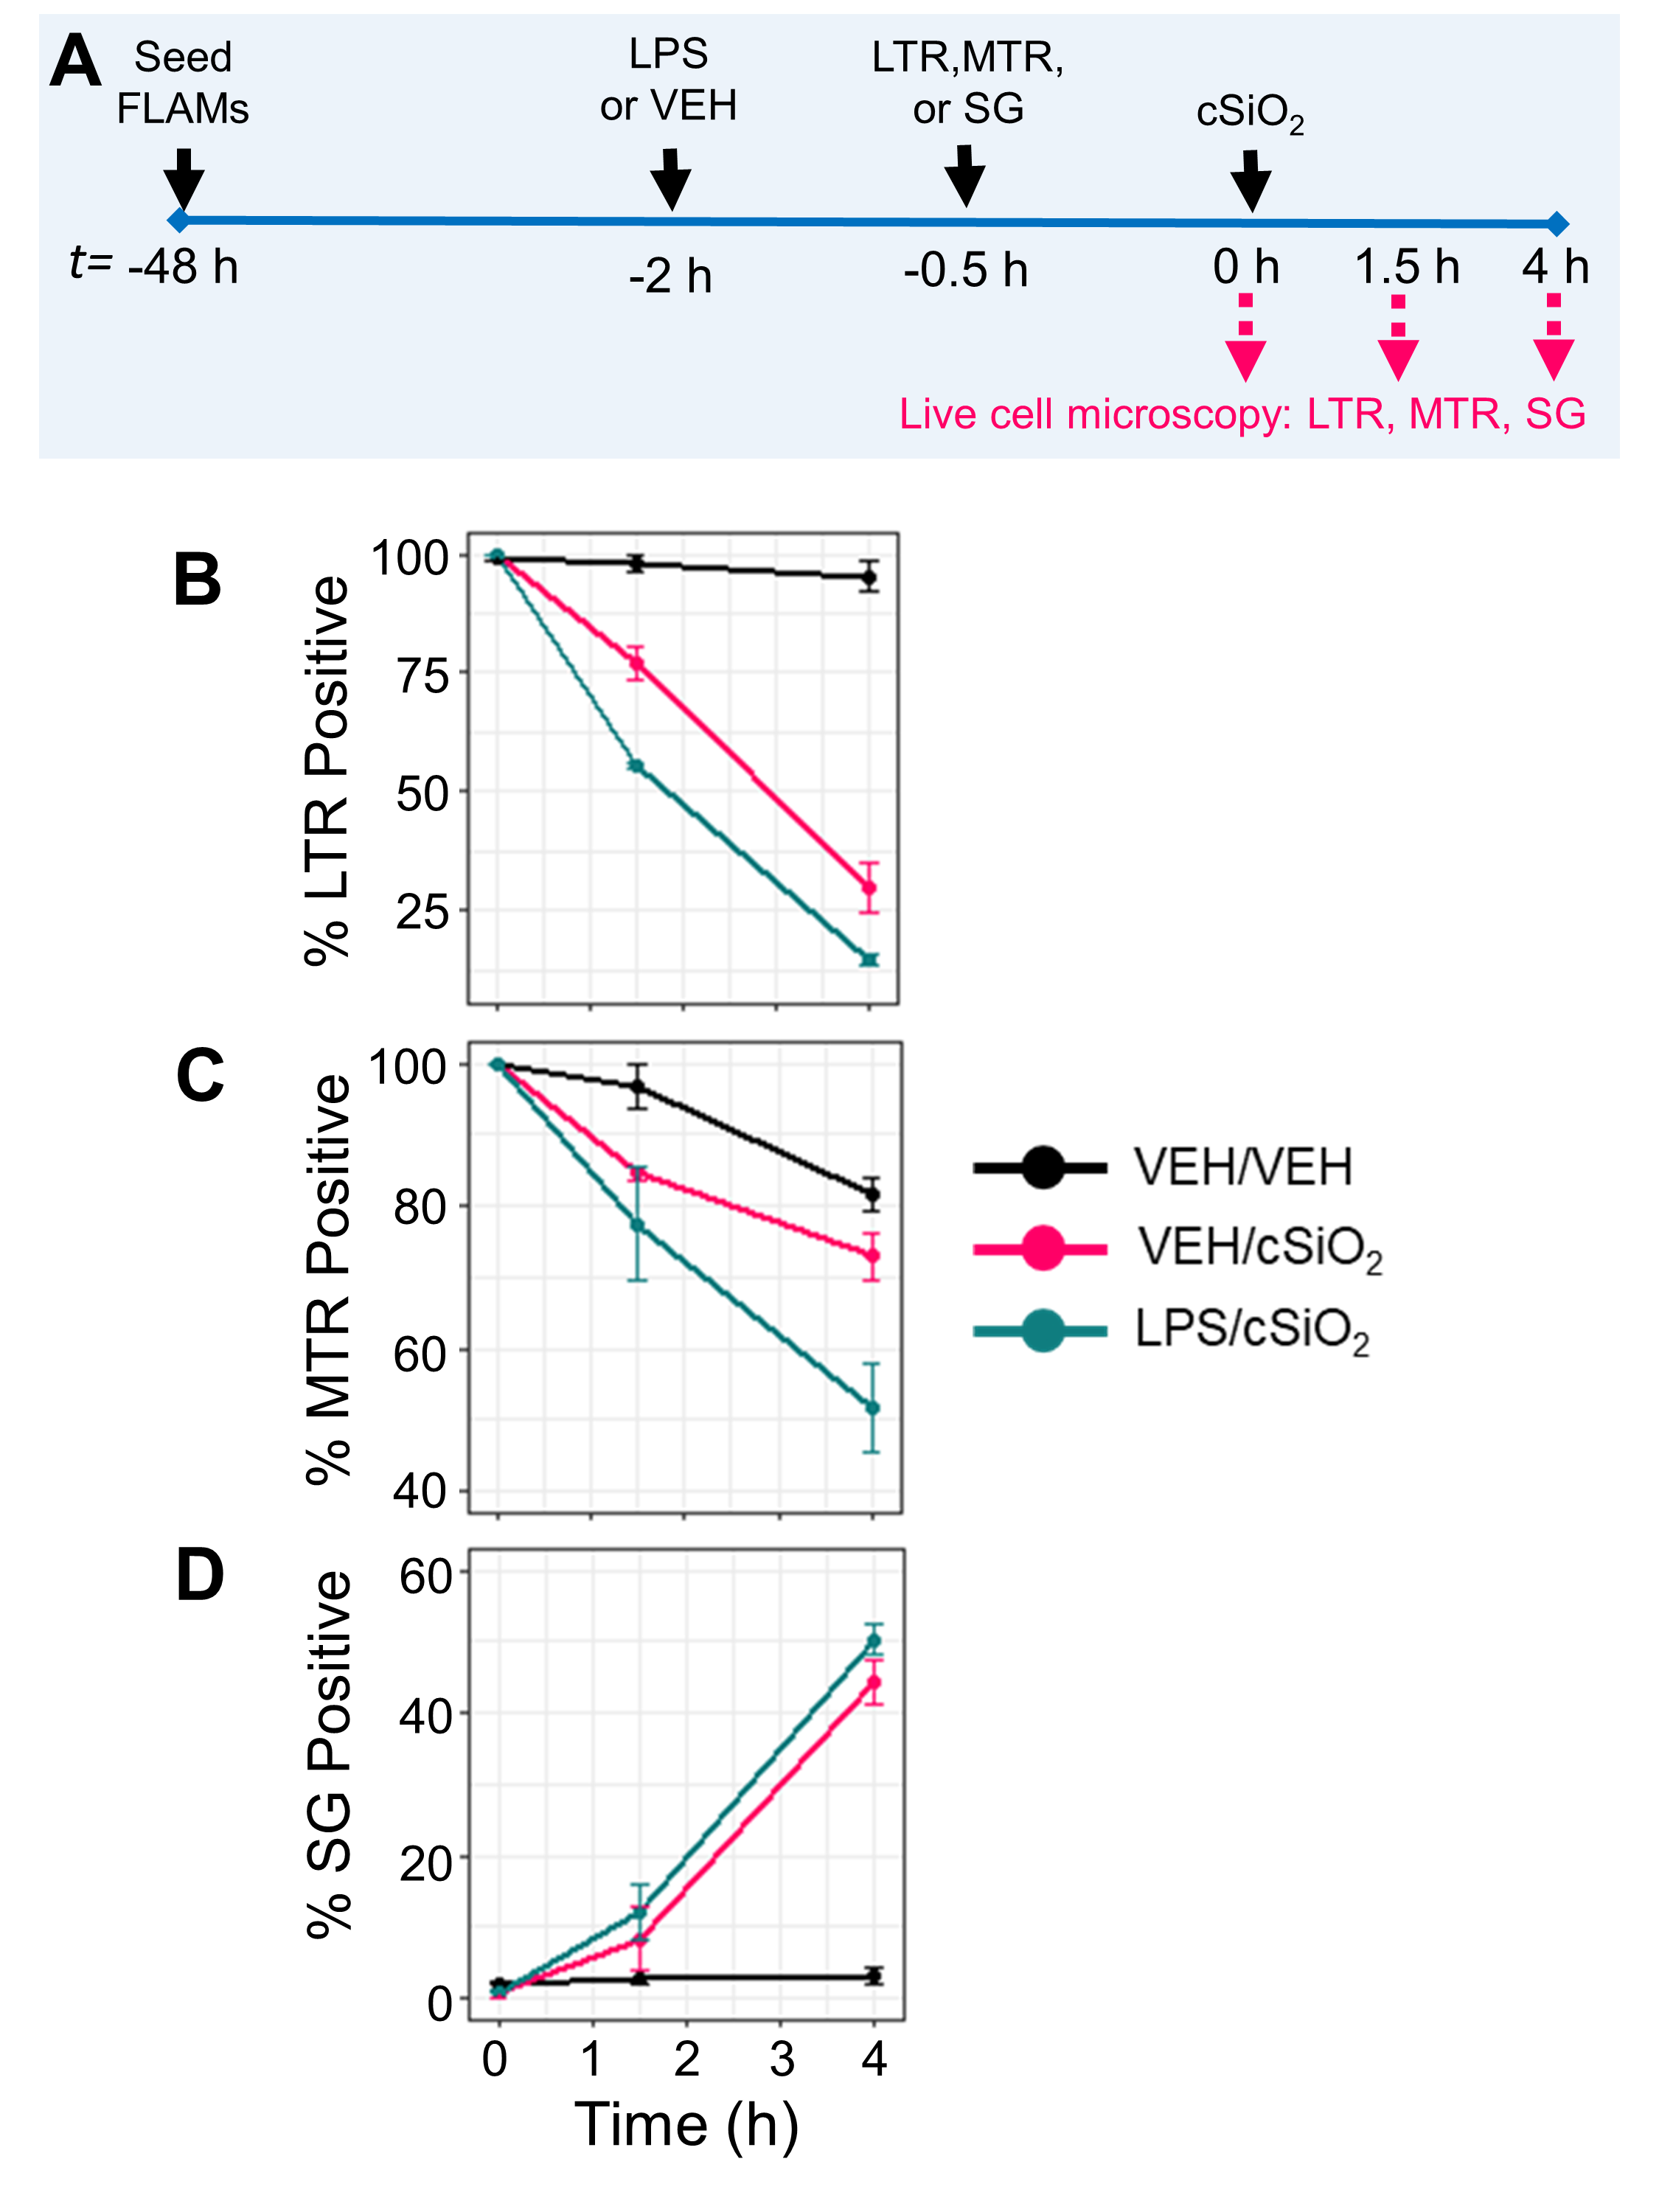


**Supplementary Figure 3. LPS accelerates cSiO2-induced lysosomal membrane permeabilization and mitochondrial toxicity in FLAMs. (A)** FLAMs were incubated with LPS (20 ng/ml) or PBS VEH for 1.5 h then stained with LysoTracker Red (LTR; 50 nM), MitoTracker Red (MTR; 25 nM), or SYTOX Green (SG; 200 nM) in DPBS+/+ for 30 min. After 30 minutes to allow fluorescent dyes to equilibrate, cSiO2 was added dropwise at 0 or 12.5 μg/cm2. **(B)** Percent LTR+, **(C)** MTR+, and **(D)** SG+ cells from 0 to 4 h post cSiO2 quantified using CellProfiler 4.2.1 and RStudio Desktop. Data are shown as mean ± SEM.

**SUPPLEMENTAL REFERENCES**

1. Canning BJ, Hmieleski RR, Spannhake EW, Jakab GJ. Ozone reduces murine alveolar and peritoneal macrophage phagocytosis: the role of prostanoids. Am J Physiol. 1991;261(4 Pt 1):L277-82.

2. Birrell MA, Maher SA, Dekkak B, Jones V, Wong S, Brook P, et al. Anti-inflammatory effects of PGE2 in the lung: role of the EP4 receptor subtype. Thorax. 2015;70(8):740-7.

3. Speth JM, Bourdonnay E, Penke LR, Mancuso P, Moore BB, Weinberg JB, et al. Alveolar Epithelial Cell-Derived Prostaglandin E2 Serves as a Request Signal for Macrophage Secretion of Suppressor of Cytokine Signaling 3 during Innate Inflammation. J Immunol. 2016;196(12):5112-20.

4. Tang T, Scambler TE, Smallie T, Cunliffe HE, Ross EA, Rosner DR, et al. Macrophage responses to lipopolysaccharide are modulated by a feedback loop involving prostaglandin E(2), dual specificity phosphatase 1 and tristetraprolin. Sci Rep. 2017;7(1):4350.

5. Penke LR, Speth JM, Draijer C, Zaslona Z, Chen J, Mancuso P, et al. PGE(2) accounts for bidirectional changes in alveolar macrophage self-renewal with aging and smoking. Life Sci Alliance. 2020;3(11).

6. Ford-Hutchinson AW, Bray MA, Doig MV, Shipley ME, Smith MJ. Leukotriene B, a potent chemokinetic and aggregating substance released from polymorphonuclear leukocytes. Nature. 1980;286(5770):264-5.

7. Hafstrom I, Palmblad J, Malmsten CL, Radmark O, Samuelsson B. Leukotriene B4--a stereospecific stimulator for release of lysosomal enzymes from neutrophils. FEBS Lett. 1981;130(1):146-8.

8. Dubois CM, Bissonnette E, Rola-Pleszczynski M. Asbestos fibers and silica particles stimulate rat alveolar macrophages to release tumor necrosis factor. Autoregulatory role of leukotriene B4. Am Rev Respir Dis. 1989;139(5):1257-64.

9. Wasserman MA, Griffin RL. Thromboxane B2--comparative bronchoactivity in experimental systems. Eur J Pharmacol. 1977;46(4):303-13.

10. Kitchen EA, Boot JR, Dawson W. Chemotactic activity of thromboxane B2, prostaglandins and their metabolites for polymorphonuclear leucocytes. Prostaglandins. 1978;16(2):239-44.

11. Burhop KE, Selig WM, Malik AB. Monohydroxyeicosatetraenoic acids (5-HETE and 15-HETE) induce pulmonary vasoconstriction and edema. Circ Res. 1988;62(4):687-98.

12. Goetzl EJ, Brash AR, Tauber AI, Oates JA, Hubbard WC. Modulation of human neutrophil function by monohydroxy-eicosatetraenoic acids. Immunology. 1980;39(4):491-501.

13. Chang J, Lamb B, Marinari L, Kreft AF, Lewis AJ. Modulation by hydroxyeicosatetraenoic acids (HETEs) of arachidonic acid metabolism in mouse resident peritoneal macrophages. Eur J Pharmacol. 1985;107(2):215-22.

14. Chavis C, Godard P, Crastes de Paulet A, Damon M. Formation of lipoxins and leukotrienes by human alveolar macrophages incubated with 15(S)-HETE: a model for cellular cooperation between macrophages and airway epithelial cells. Eicosanoids. 1992;5(3-4):203-11.

15. Onodera T, Fukuhara A, Shin J, Hayakawa T, Otsuki M, Shimomura I. Eicosapentaenoic acid and 5-HEPE enhance macrophage-mediated Treg induction in mice. Sci Rep. 2017;7(1):4560.

16. Heidel JR, Taylor SM, Laegreid WW, Silflow RM, Liggitt HD, Leid RW. In vivo chemotaxis of bovine neutrophils induced by 5-lipoxygenase metabolites of arachidonic and eicosapentaenoic acid. Am J Pathol. 1989;134(3):671-6.

17. Yamada H, Uemura A, Miyasaka R. 8(R)-Hydroxyeicosapentaenoic acid (8R-HEPE) induces transcription of cholesterol efflux receptors via activation of liver X receptor in macrophages. Biosci Biotechnol Biochem. 2023;87(6):584-91.

18. Miller C, Yamaguchi RY, Ziboh VA. Guinea pig epidermis generates putative anti-inflammatory metabolites from fish oil polyunsaturated fatty acids. Lipids. 1989;24(12):998-1003.

19. Sapieha P, Stahl A, Chen J, Seaward MR, Willett KL, Krah NM, et al. 5-Lipoxygenase metabolite 4-HDHA is a mediator of the antiangiogenic effect of omega-3 polyunsaturated fatty acids. Sci Transl Med. 2011;3(69):69ra12.

20. Borsini A, Nicolaou A, Camacho-Munoz D, Kendall AC, Di Benedetto MG, Giacobbe J, et al. Omega-3 polyunsaturated fatty acids protect against inflammation through production of LOX and CYP450 lipid mediators: relevance for major depression and for human hippocampal neurogenesis. Mol Psychiatry. 2021;26(11):6773-88.

21. Croset M, Sala A, Folco G, Lagarde M. Inhibition by lipoxygenase products of TXA2-like responses of platelets and vascular smooth muscle. 14-Hydroxy from 22:6n-3 is more potent than 12-HETE. Biochem Pharmacol. 1988;37(7):1275-80.

22. Gonzalez-Periz A, Planaguma A, Gronert K, Miquel R, Lopez-Parra M, Titos E, et al. Docosahexaenoic acid (DHA) blunts liver injury by conversion to protective lipid mediators: protectin D1 and 17S-hydroxy-DHA. FASEB J. 2006;20(14):2537-9.

23. Weylandt KH, Krause LF, Gomolka B, Chiu CY, Bilal S, Nadolny A, et al. Suppressed liver tumorigenesis in fat-1 mice with elevated omega-3 fatty acids is associated with increased omega-3 derived lipid mediators and reduced TNF-alpha. Carcinogenesis. 2011;32(6):897-903.

24. Bento AF, Claudino RF, Dutra RC, Marcon R, Calixto JB. Omega-3 fatty acid-derived mediators 17(R)-hydroxy docosahexaenoic acid, aspirin-triggered resolvin D1 and resolvin D2 prevent experimental colitis in mice. J Immunol. 2011;187(4):1957-69.
